# Supplementary material for: Comparison of ±σ-hole and ±R˙-hole interactions formed by tetrel-containing complexes: a computational study
Source: Royal Society of Chemistry journal article supplement (doi:10.1039/d0ra09564h), 2021-01-01
Supplement: d0ra09564h1.pdf [file d0ra09564h1.pdf]

# **Comparison of $\pm\sigma$ -hole and $\pm R\cdot$ -hole interactions formed by tetrel-containing complexes: A computational study**

Mahmoud A. A. Ibrahim<sup>1,\*</sup>, and Ebtisam M. Z. Telb<sup>1</sup>

<sup>1</sup>Computational Chemistry Laboratory, Chemistry Department, Faculty of Science,

Minia University, Minia 61519, Egypt

\* Corresponding author: Mahmoud A. A. Ibrahim; [m.ibrahim@compchem.net](mailto:m.ibrahim@compchem.net)

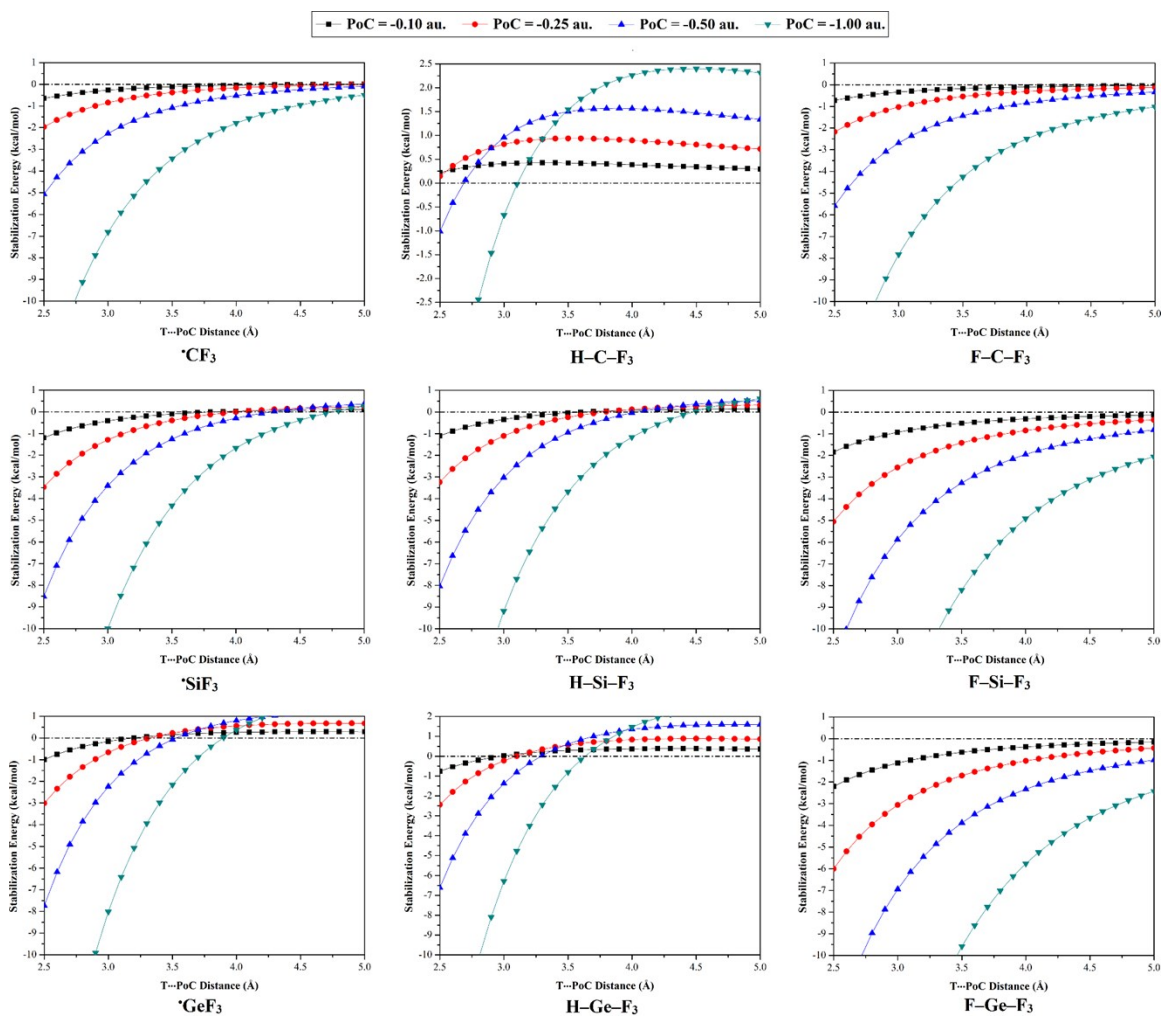

**Figure S1:** Generated molecular stabilization energy curves for the  $\cdot\text{TF}_3$  and  $\text{W-T-F}_3$  systems (where  $\text{T} = \text{C}, \text{Si},$  and  $\text{Ge}$ , and  $\text{W} = \text{H}$  and  $\text{F}$ ) in the presence of  $-0.10$ ,  $-0.25$ ,  $-0.50$ , and  $-1.00$  au PoCs at  $\text{T}\cdots\text{PoC}$  distances ranging from  $2.5 \text{ \AA}$  to  $5.0 \text{ \AA}$ .

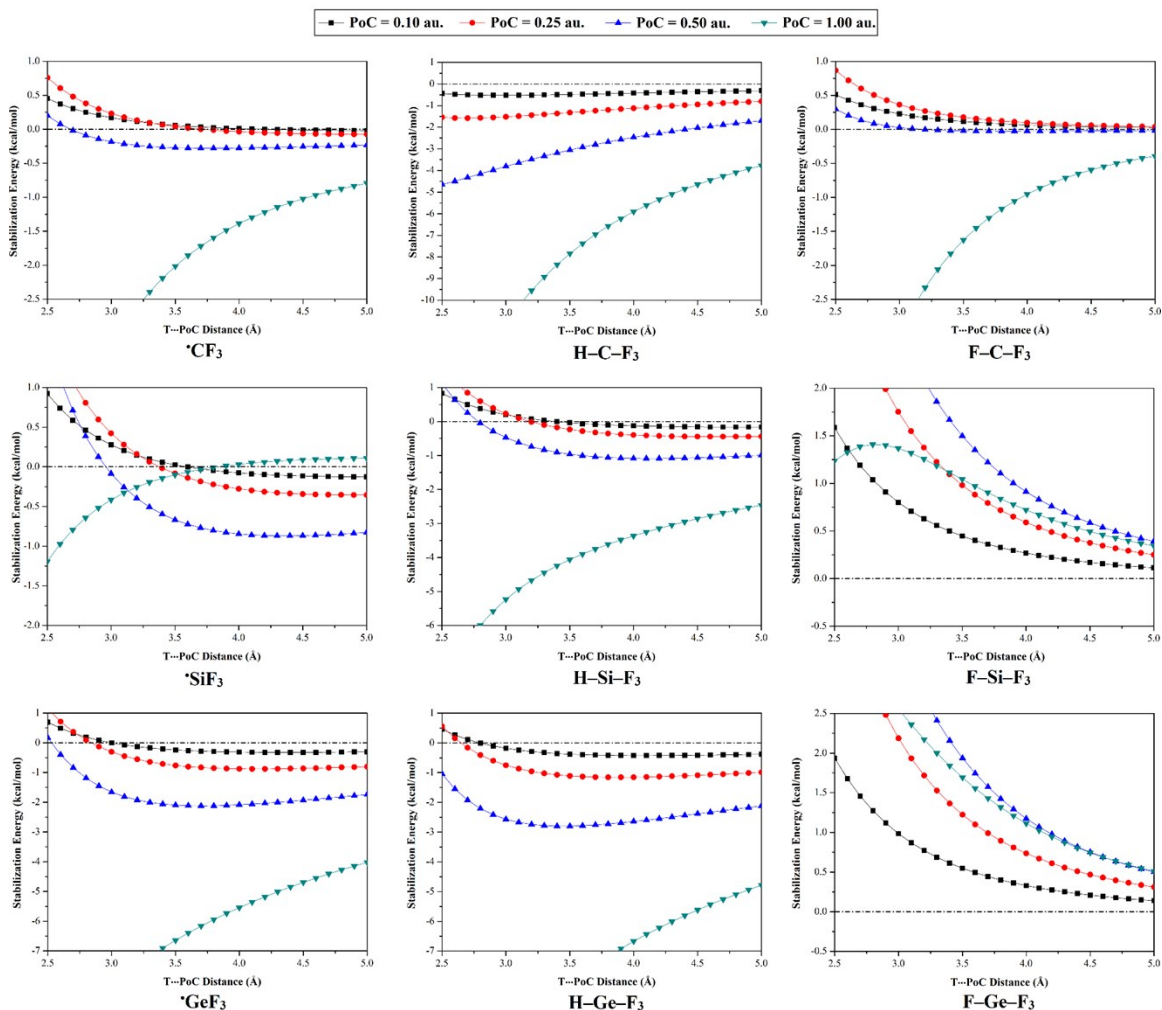

**Figure S2:** Generated molecular stabilization energy curves for the  $\cdot\text{TF}_3$  and  $\text{W-T-F}_3$  systems (where  $T = \text{C, Si, and Ge}$ , and  $W = \text{H and F}$ ) in the presence of 0.10, 0.25, 0.50, and 1.00 au PoCs at  $T \cdots \text{PoC}$  distances ranging from 2.5 Å to 5.0 Å.

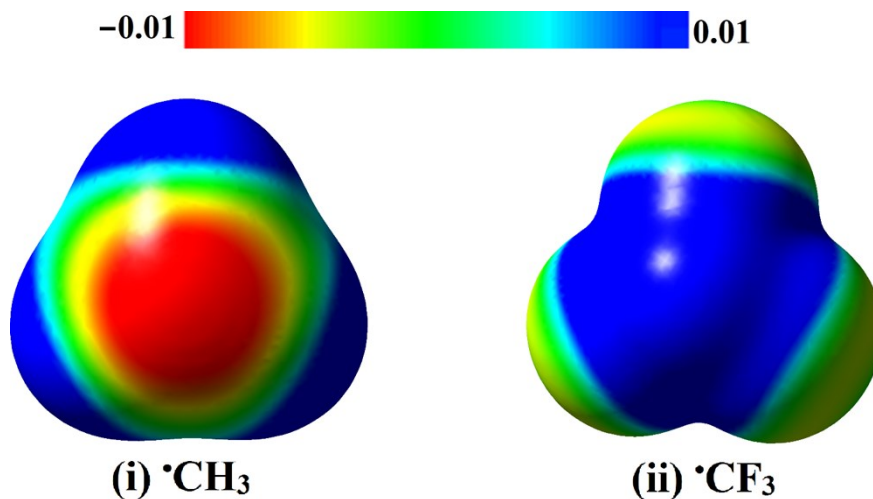

**Figure S3:** The generated molecular electrostatic potential (MEP) maps of the (i)  $\cdot\text{CH}_3$  and (ii)  $\cdot\text{CF}_3$  molecules at the MP2/aug-cc-pVTZ level of theory. The MEP maps were plotted at 0.002 au electron density contours, and the electrostatic potentials vary from  $-0.01$  au (red) to  $0.01$  au (blue).

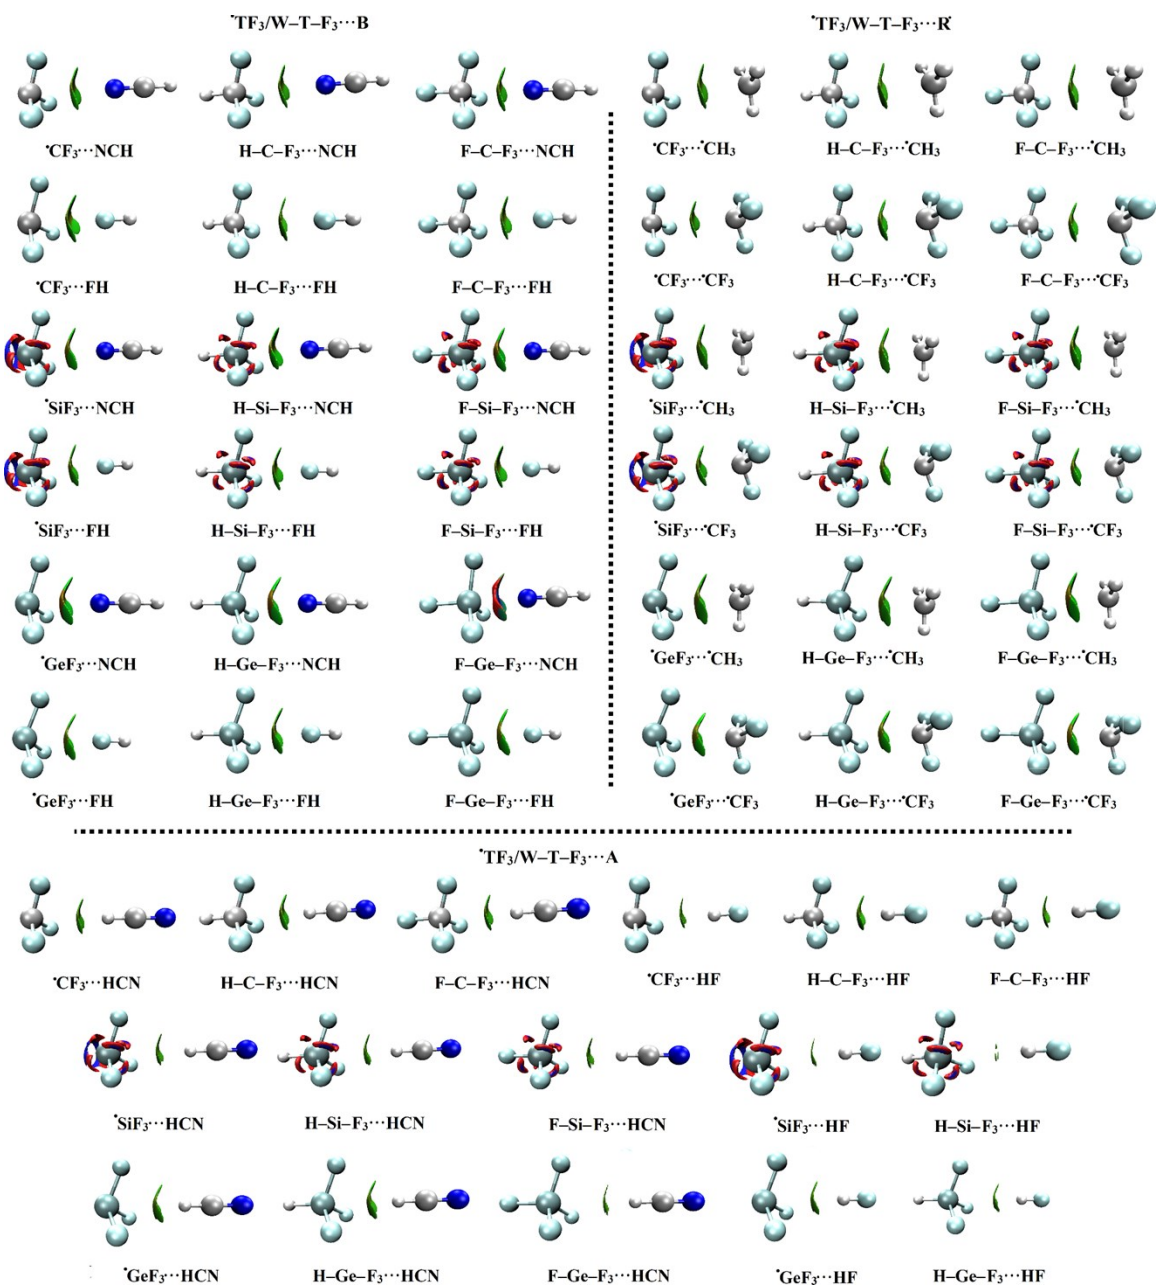

**Figure S4:** NCI isosurfaces for the studied  ${}^{\bullet}\text{TF}_3\cdots$  and  $\text{W-T-F}_3\cdots$  B/R/A complexes (where T = C, Si, and Ge, W = H and F, B = Lewis bases, R = free radicals, and A = Lewis acids).

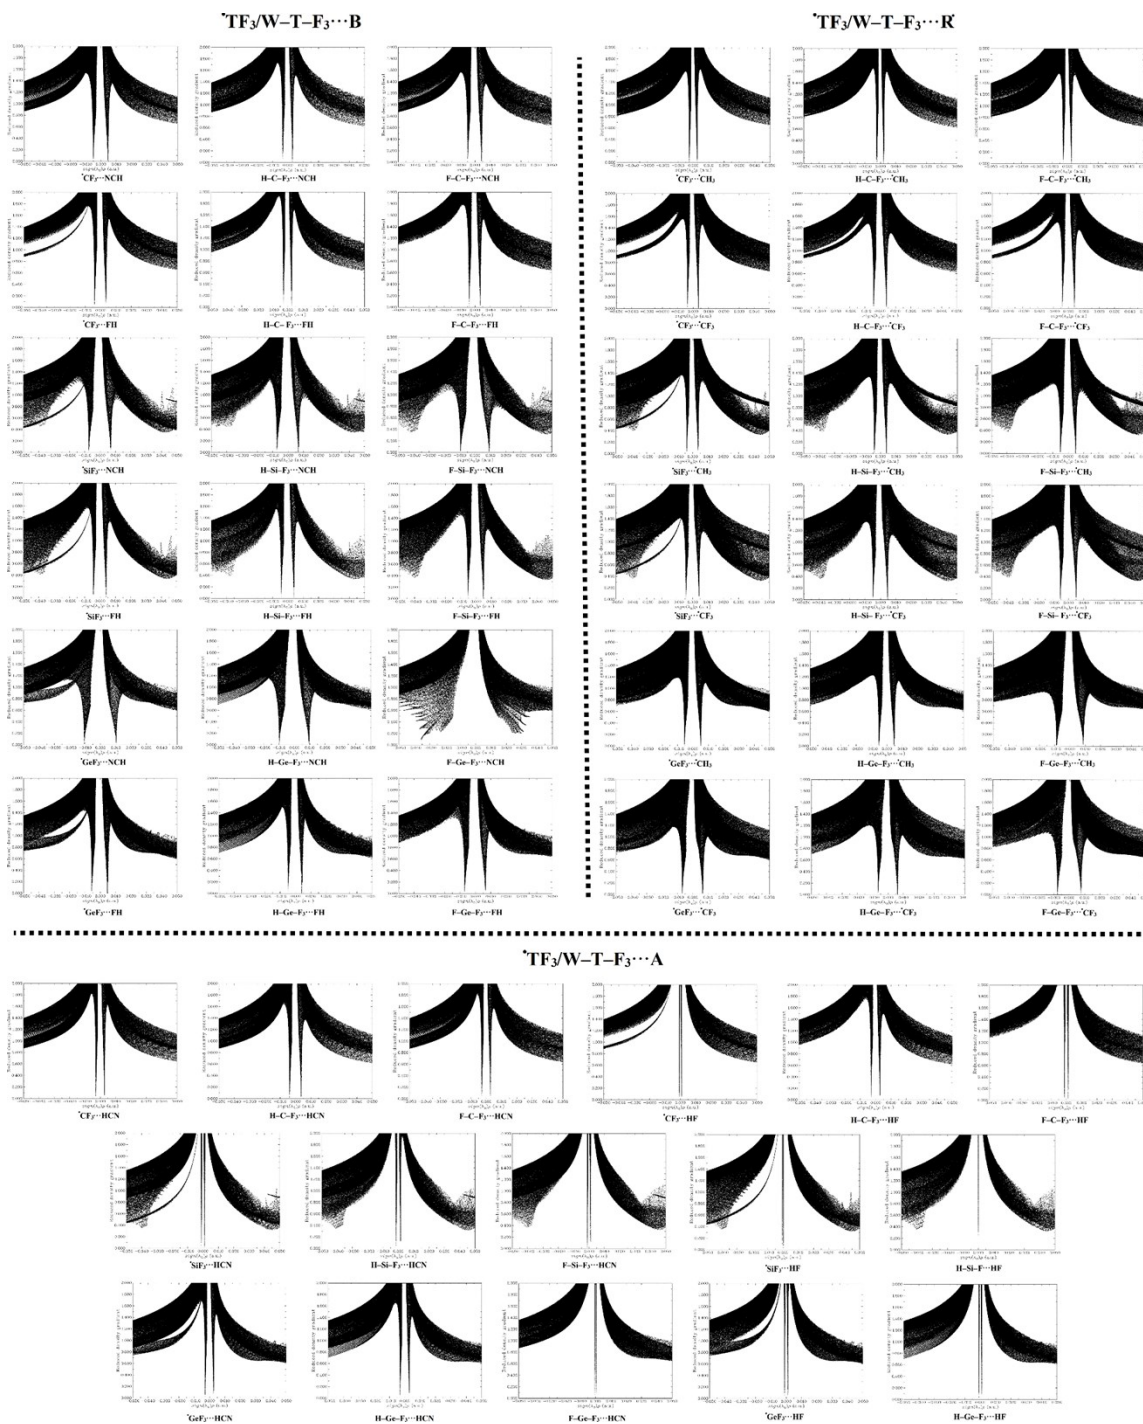

**Figure S5:** Plots of the electron density and its reduced gradient for the studied  ${}^{\bullet}\text{TF}_3\cdots$  and  $\text{W}-\text{T}-\text{F}_3\cdots \text{B}/\text{R}^{\bullet}/\text{A}$  complexes (where  $\text{T} = \text{C}, \text{Si},$  and  $\text{Ge}$ ,  $\text{W} = \text{H}$  and  $\text{F}$ ,  $\text{B} =$  Lewis bases,  $\text{R}^{\bullet} =$  free radicals, and  $\text{A} =$  Lewis acids).
